# Supplementary figures and images for: Phase I clinical study of liver regenerative therapy for cirrhosis by intrahepatic arterial infusion of freshly isolated autologous adipose tissue-derived stromal/stem (regenerative) cell
Source: PubMed Central journal article supplement — Regen Ther. 2017 Mar 9;6:52–64. doi: 10.1016/j.reth.2016.12.001 (PMC6134901; doi:10.1016/j.reth.2016.12.001), 2017-03-09

# Supplemental Fig.1

(A)

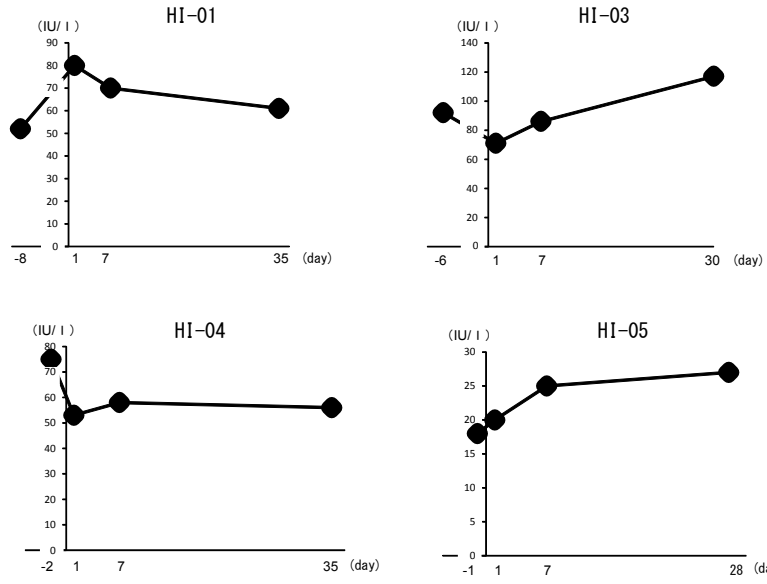

(B)

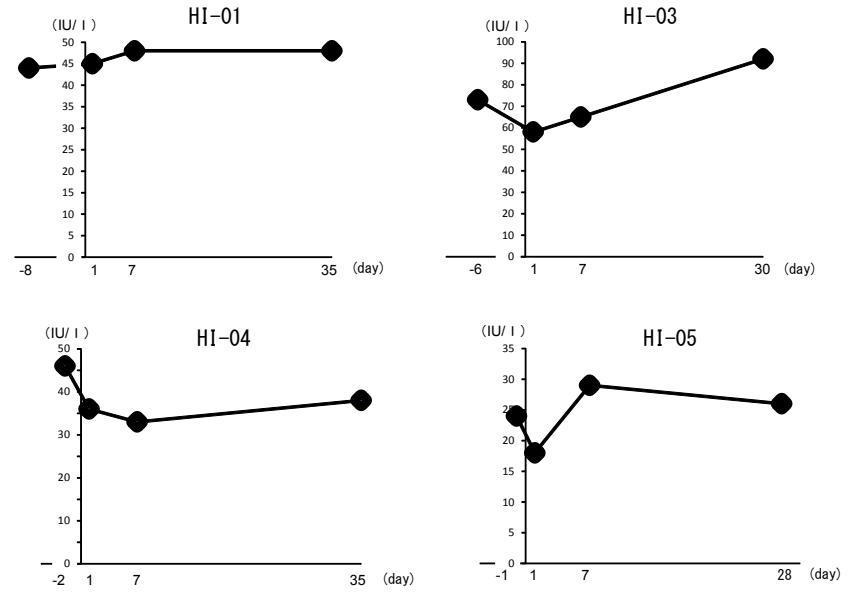

(C)

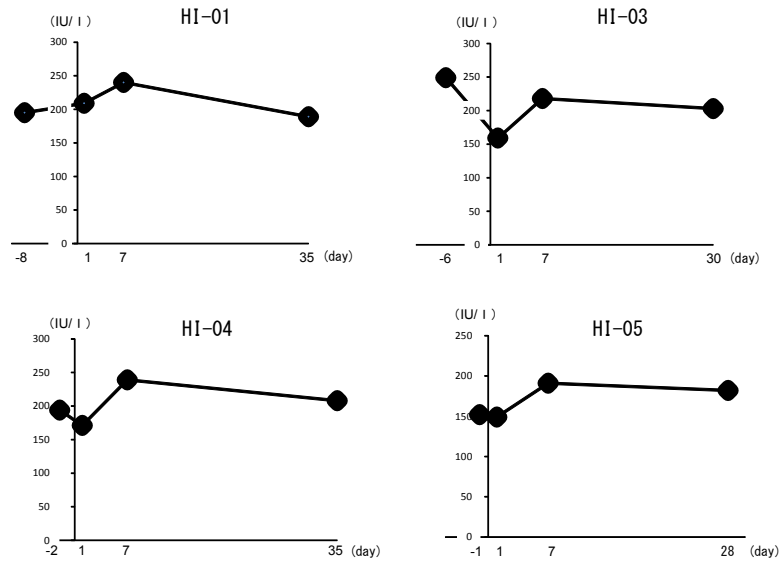

(D)

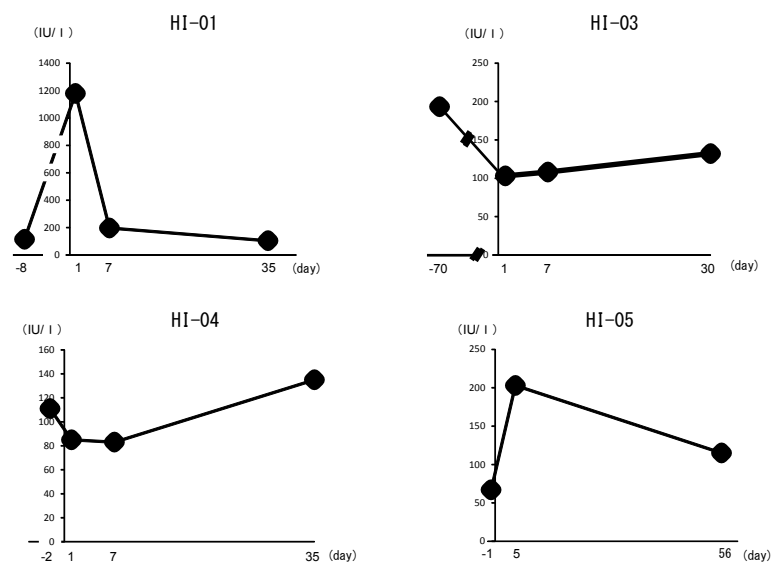

Supplement: mmc1.pdf [file mmc1.pdf]

# Supplemental Fig.2

(A)

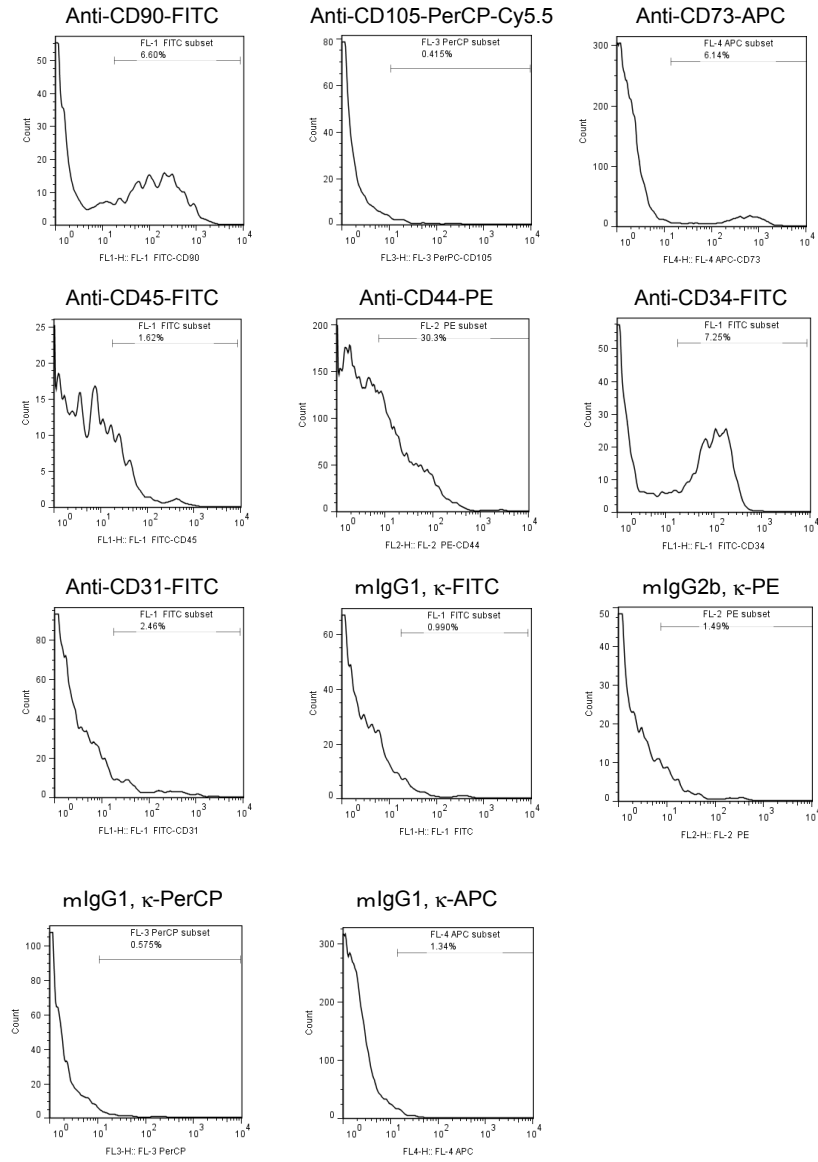

(B)

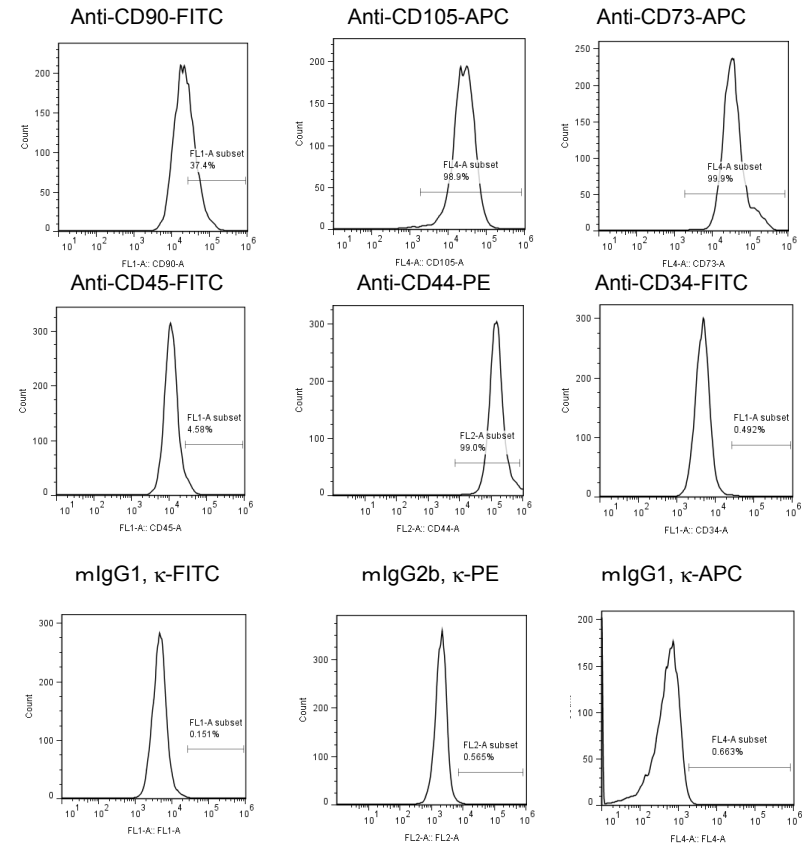

Supplement: mmc2.pdf [file mmc2.pdf]
